# Supplementary material for: Contrast-Enhanced Spectral Mammography in the Evaluation of Breast Microcalcifications: Controversies and Diagnostic Management
Source: MDPI journal article supplement (doi:10.3390/healthcare11040511), 2023-02-09
Supplement: s1 [file s1]

Supplementary Table S1: Specific histological subtypes of the study breast lesions

| Type of lesion         | Benign / Malignant    | Histological result                                         | Overall (N=377) |
|------------------------|-----------------------|-------------------------------------------------------------|-----------------|
| Microcalcifications    | Benign and B3 lesions | Adenosis                                                    | 4               |
|                        |                       | Atypical ductal hyperplasia (DIN1b)                         | 5               |
|                        |                       | Atypical lobular hyperplasia (LIN1)                         | 5               |
|                        |                       | Breast fibroadenoma                                         | 2               |
|                        |                       | Ductal hyperplasia without atypia                           | 4               |
|                        |                       | Fibrocystic breast disease                                  | 42              |
|                        |                       | Flat epithelial atypia                                      | 1               |
|                        |                       | Flogosis                                                    | 2               |
|                        |                       | Intermediate grade lobular intraepithelial neoplasia (lin2) | 2               |
|                        |                       | Intraductal papilloma                                       | 1               |
|                        |                       | Mucocele like lesion                                        | 1               |
|                        |                       | Pseudoangiomatous stromal hyperplasia (pash)                | 1               |
|                        |                       | Radial scar                                                 | 1               |
|                        | Malignant             | High grade ductal carcinoma in situ (DIN3)                  | 6               |
|                        |                       | Intermediate grade ductal carcinoma in situ (DIN2)          | 9               |
|                        |                       | Invasive ductal carcinoma                                   | 11              |
|                        |                       | Invasive lobular carcinoma                                  | 1               |
|                        |                       | Low grade ductal carcinoma in situ (DIN1c)                  | 3               |
| No microcalcifications | Benign and B3 lesions | Adenosis                                                    | 7               |
|                        |                       | Atypical ductal hyperplasia (din1b)                         | 1               |
|                        |                       | Breast fibroadenoma                                         | 8               |
|                        |                       | Ductal hyperplasia without atypia                           | 2               |
|                        |                       | Fibroadenoma                                                | 2               |
|                        |                       | Fibrocystic breast disease                                  | 14              |
|                        |                       | Fibrosis                                                    | 5               |
|                        |                       | Flat epithelial atypia                                      | 2               |
|                        |                       | Flogosis                                                    | 5               |
|                        |                       | Intraductal papilloma                                       | 5               |
|                        |                       | Lobular intraepithelial neoplasia (lin2)                    | 3               |
|                        |                       | Papillomatosis                                              | 1               |
|                        |                       | Radial scar                                                 | 2               |
|                        | Malignant             | Acinic cell carcinoma                                       | 2               |
|                        |                       | Cribriiform carcinoma                                       | 2               |
|                        |                       | High grade ductal carcinoma in situ (din3)                  | 3               |
|                        |                       | Intermediate grade ductal carcinoma in situ (din2)          | 9               |
|                        |                       | Invasive cribriform carcinoma                               | 2               |
|                        |                       | Invasive ductal carcinoma                                   | 152             |
|                        |                       | Invasive lobular carcinoma                                  | 32              |
|                        |                       | Invasive mixed carcinoma                                    | 10              |
|                        |                       | Low grade ductal carcinoma in situ (din1c)                  | 4               |
|                        |                       | Malignant phyllode                                          | 1               |
|                        |                       | Micropapillary carcinoma                                    | 1               |
|                        |                       | Mucinous carcinoma                                          | 1               |
